# Supplementary material
Source: MDPI journal article supplement (https://www.mdpi.com/2073-445X/13/5/710)
Supplement: s1 [file s1]

### Supplementary Material Table S1

Two-stage least-squares regression.

| Variables                                | Phase I                |                            | Phase II               |
|------------------------------------------|------------------------|----------------------------|------------------------|
|                                          | sprawl<br>(1)          | sprawl <sup>2</sup><br>(2) | (3)                    |
| Updste2                                  | −0.0001***<br>(0.0000) | −0.0001***<br>(0.0000)     |                        |
| Sloalu2                                  | −0.0005*<br>(0.0002)   | −0.0010***<br>(0.0003)     |                        |
| L.sprawl                                 | 0.7651***<br>(0.0547)  | 0.1603**<br>(0.0661)       |                        |
| L.sprawl <sup>2</sup>                    | 0.0056<br>(0.0639)     | 0.5956***<br>(0.0815)      |                        |
| sprawl                                   |                        |                            | 3.5425***<br>(0.7668)  |
| sprawl <sup>2</sup>                      |                        |                            | −3.8829***<br>(0.7872) |
| Control variables                        | YES                    | YES                        | YES                    |
| Province-fixed effect                    | YES                    | YES                        | YES                    |
| Industry-fixed effect                    | YES                    | YES                        | YES                    |
| Year-fixed effect                        | YES                    | YES                        | YES                    |
| Cragg–Donald Wald F statistic            |                        |                            | 2551.496               |
| Kleibergen–Paap rk Wald F statistic      |                        |                            | 161.569                |
| Hansen J statistic                       |                        |                            | 3.012                  |
| p-value corresponding to the J statistic |                        |                            | 0.2218                 |
| N                                        | 18321                  | 18321                      | 18321                  |
| R <sup>2</sup>                           |                        |                            | 0.2972                 |

\*\*\*, \*\*, and \* indicate significance at the statistical levels of 1%, 5%, and 10%, respectively.

### Supplementary Material Table S2

Regression by year.

| Variables           | 2010<br>(1)                 | 2011<br>(2)                   | 2012<br>(3)                   | 2013<br>(4)                | 2014<br>(5)                  | 2015<br>(6)                   | 2016<br>(7)                  | 2017<br>(8)                | 2018<br>(9)                  | 2019<br>(10)                | 2020<br>(11)                  |
|---------------------|-----------------------------|-------------------------------|-------------------------------|----------------------------|------------------------------|-------------------------------|------------------------------|----------------------------|------------------------------|-----------------------------|-------------------------------|
| sprawl              | 2.635<br>8*<br>(1.385<br>0) | 2.890<br>0***<br>(0.621<br>0) | 2.200<br>7***<br>(0.54<br>35) | 1.970<br>9<br>(2.05<br>49) | 4.121<br>3**<br>(1.639<br>4) | 4.559<br>5***<br>(1.060<br>1) | 2.429<br>3**<br>(1.04<br>20) | 1.247<br>9<br>(1.185<br>0) | 1.772<br>6**<br>(0.828<br>9) | 1.867<br>4*<br>(0.988<br>6) | 2.096<br>7***<br>(0.453<br>9) |
| sprawl <sup>2</sup> | −3.11<br>39**               | −2.43<br>80***                | −2.76<br>52***                | −2.85<br>98                | −4.51<br>87**                | −4.59<br>17***                | −2.54<br>38**<br>*           | −1.02<br>88                | −1.93<br>42**                | −2.12<br>78**               | −2.01<br>75***                |

|                       |              |              |              |              |              |              |              |              |              |              |              |
|-----------------------|--------------|--------------|--------------|--------------|--------------|--------------|--------------|--------------|--------------|--------------|--------------|
|                       | (1.142<br>0) | (0.585<br>2) | (0.48<br>72) | (2.07<br>69) | (1.581<br>0) | (0.786<br>7) | (0.83<br>01) | (1.138<br>4) | (0.706<br>0) | (0.877<br>8) | (0.452<br>0) |
| Control variables     | YES          |
| Province-fixed effect | YES          |
| Industry-fixed effect | YES          |
| Year-fixed effect     | YES          |
| N                     | 760          | 963          | 1199         | 1240         | 1329         | 1485         | 1649         | 1962         | 2073         | 2179         | 2445         |
| R <sup>2</sup>        | 0.313<br>7   | 0.301<br>7   | 0.306<br>1   | 0.334<br>0   | 0.338<br>6   | 0.333<br>5   | 0.380<br>8   | 0.387<br>0   | 0.403<br>5   | 0.395<br>6   | 0.411<br>0   |

\*\*\*, \*\*, and \* indicate significance at the statistical levels of 1%, 5%, and 10%, respectively.

### Supplementary Material Table S3

Substituting variables tests.

| Variables             | Substitution of variables | Patent types           |                        |                        |
|-----------------------|---------------------------|------------------------|------------------------|------------------------|
|                       | (1)                       | Inventions (2)         | Utility models (3)     | Designs (4)            |
| sprawl                | 1.9688***<br>(0.5832)     | 1.6506***<br>(0.4114)  | 2.4896***<br>(0.4749)  | 1.1038**<br>(0.4160)   |
| sprawl <sup>2</sup>   | −2.3049***<br>(0.5104)    | −1.7642***<br>(0.3759) | −2.5644***<br>(0.4441) | −1.2672***<br>(0.3944) |
| Control variables     | YES                       | YES                    | YES                    | YES                    |
| Province-fixed effect | YES                       | YES                    | YES                    | YES                    |
| Industry-fixed effect | YES                       | YES                    | YES                    | YES                    |
| Year-fixed effect     | YES                       | YES                    | YES                    | YES                    |
| N                     | 17255                     | 21882                  | 21882                  | 21882                  |
| R <sup>2</sup>        | 0.4321                    | 0.3940                 | 0.3628                 | 0.1767                 |

\*\*\* and \*\* indicate significance at the statistical levels of 1% and 5%, respectively.

### Supplementary Material Table S4

Other robustness tests.

| Variables | Excluding special samples | Cross-multiplication fixed effect | Explanatory variables lagged one period | Explanatory variables lagged two periods |
|-----------|---------------------------|-----------------------------------|-----------------------------------------|------------------------------------------|
|           | (1)                       | (2)                               | (3)                                     | (4)                                      |
| sprawl    | 2.2127***                 | 2.5733***                         | 1.9750***                               | 1.5500**                                 |

|                              |            |            |            |            |
|------------------------------|------------|------------|------------|------------|
|                              | (0.4661)   | (0.6123)   | (0.5974)   | (0.6486)   |
| sprawl <sup>2</sup>          | −2.4412*** | −2.7692*** | −2.2330*** | −1.8202*** |
|                              | (0.4124)   | (0.5222)   | (0.5237)   | (0.5244)   |
| Control variables            | YES        | YES        | YES        | YES        |
| Province-fixed effect        | YES        | YES        | YES        | YES        |
| Industry-fixed effect        | YES        | YES        | YES        | YES        |
| Year-fixed effect            | YES        | YES        | YES        | YES        |
| Industry × year fixed effect | NO         | YES        | NO         | NO         |
| Province × year fixed effect | NO         | YES        | NO         | NO         |
| N                            | 17287      | 17284      | 18321      | 15441      |
| R <sup>2</sup>               | 0.3776     | 0.3948     | 0.3955     | 0.3769     |

\*\*\* and \*\* indicate significance at the statistical levels of 1% and 5%, respectively.

#### Supplementary Material Table S5

Regional heterogeneity.

| Variables             | East<br>(3)            | Central<br>(4)       | West<br>(5)           | North-east<br>(6)     |
|-----------------------|------------------------|----------------------|-----------------------|-----------------------|
| sprawl                | 2.6028***<br>(0.5317)  | 1.1965*<br>(0.5873)  | 1.5199**<br>(0.5393)  | 3.7468*<br>(1.9859)   |
| sprawl <sup>2</sup>   | −3.0926***<br>(0.4825) | −1.2621*<br>(0.7095) | −1.1294**<br>(0.4255) | −3.4162**<br>(1.5219) |
| Control variables     | YES                    | YES                  | YES                   | YES                   |
| Province-fixed effect | YES                    | YES                  | YES                   | YES                   |
| Industry-fixed effect | YES                    | YES                  | YES                   | YES                   |
| Year-fixed effect     | YES                    | YES                  | YES                   | YES                   |
| N                     | 10822                  | 3135                 | 2369                  | 958                   |
| R <sup>2</sup>        | 0.3545                 | 0.4424               | 0.4742                | 0.3472                |

\*\*\*, \*\*, and \* indicate significance at the statistical levels of 1%, 5%, and 10%, respectively.

#### Supplementary Material Table S6

Heterogeneity of city size and industry type.

| Variables | City size          |                     |                       | Industry type          |                            |
|-----------|--------------------|---------------------|-----------------------|------------------------|----------------------------|
|           | Large city         | Medium-sized city   | Small city            | Manufacturing industry | Non-manufacturing industry |
|           | (1)                | (2)                 | (3)                   | (4)                    | (5)                        |
| sprawl    | 2.4104<br>(3.4239) | −0.1364<br>(0.5570) | 2.7801***<br>(0.3670) | 1.7268***<br>(0.4304)  | 2.2963**<br>(1.0384)       |

|                       |                     |                     |                        |                        |                       |
|-----------------------|---------------------|---------------------|------------------------|------------------------|-----------------------|
| sprawl <sup>2</sup>   | −1.9681<br>(4.9040) | −0.2696<br>(0.8821) | −2.8392***<br>(0.2877) | −1.9792***<br>(0.4282) | −2.4552**<br>(1.1467) |
| Control variables     | YES                 | YES                 | YES                    | YES                    | YES                   |
| Province-fixed effect | YES                 | YES                 | YES                    | YES                    | YES                   |
| Industry-fixed effect | YES                 | YES                 | YES                    | YES                    | YES                   |
| Year-fixed effect     | YES                 | YES                 | YES                    | YES                    | YES                   |
| N                     | 3897                | 5462                | 7927                   | 12742                  | 4545                  |
| R <sup>2</sup>        | 0.4356              | 0.3856              | 0.3754                 | 0.3849                 | 0.2774                |

\*\*\* and \*\* indicate significance at the statistical levels of 1% and 5%, respectively.

### Supplementary Material Table S7

Heterogeneity of enterprise and industry characteristics.

| Variable              | Size of enterprises    |                        | Age of enterprises     |                        | Nature of enterprises |                        |
|-----------------------|------------------------|------------------------|------------------------|------------------------|-----------------------|------------------------|
|                       | Below average          | Above average          | Below average          | Above average          | State enterprise      | Non-state enterprise   |
|                       | (1)                    | (2)                    | (3)                    | (4)                    | (5)                   | (6)                    |
| sprawl                | 1.3976***<br>(0.4443)  | 2.9104**<br>(1.1293)   | 2.0942***<br>(0.5859)  | 2.4778***<br>(0.7277)  | 1.5237<br>(0.8868)    | 2.4687***<br>(0.4073)  |
| sprawl <sup>2</sup>   | −1.7347***<br>(0.3052) | −3.0413***<br>(0.9722) | −2.2393***<br>(0.5145) | −2.8086***<br>(0.6265) | −1.9043**<br>(0.6554) | −2.6311***<br>(0.3357) |
| Control variables     | YES                    | YES                    | YES                    | YES                    | YES                   | YES                    |
| Province-fixed effect | YES                    | YES                    | YES                    | YES                    | YES                   | YES                    |
| Industry-fixed effect | YES                    | YES                    | YES                    | YES                    | YES                   | YES                    |
| Year-fixed effect     | YES                    | YES                    | YES                    | YES                    | YES                   | YES                    |
| N                     | 8810                   | 8477                   | 8691                   | 8595                   | 5072                  | 12214                  |
| R <sup>2</sup>        | 0.2827                 | 0.4025                 | 0.3898                 | 0.3939                 | 0.4665                | 0.3494                 |

\*\*\* and \*\* indicate significance at the statistical levels of 1% and 5%, respectively.
